# Supplementary material
Source: PubMed Central journal article supplement (PMC8762741)
Supplement: pt1c00182_si_001.pdf [file pt1c00182_si_001.pdf]

**A SARS-CoV-2 nucleocapsid protein TR-FRET assay amenable to high throughput screening**

Kirill Gorshkov<sup>1\*</sup>, Desarey Morales Vasquez<sup>2</sup>, Kevin Chiem<sup>2</sup>, Chengjin Ye<sup>2</sup>, Bruce Nguyen Tran<sup>1</sup>, Juan Carlos de la Torre<sup>3</sup>, Thomas Moran<sup>4</sup>, Catherine Z. Chen<sup>1</sup>, Luis Martinez-Sobrido<sup>2\*</sup>, Wei Zheng<sup>1\*</sup>

Corresponding authors:

Kirill Gorshkov – [kirill.gorshkov@nih.gov](mailto:kirill.gorshkov@nih.gov)

Luis Martinez-Sobrido - [LMartinez@txbiomed.org](mailto:LMartinez@txbiomed.org)

Wei Zheng – [wzheng@mail.nih.gov](mailto:wzheng@mail.nih.gov)

Affiliations:

<sup>1</sup>National Center for Advancing Translational Sciences, 9800 Medical Center Drive, Rockville, MD 20850,

<sup>2</sup>Texas Biomedical Research Institute, 8715 West Military Drive, San Antonio, Texas 78227, United States

<sup>3</sup>Department of Immunology and Microbiology, IMM6, The Scripps Research Institute, 10550 North Torrey Pines Road, La Jolla, California 92037, United States

<sup>4</sup>Icahn School of Medicine, Mt. Sinai, 1 Gustave L. Levy Place, New York, New York 10029, United States

Keywords: SARS-CoV-2, variants of concern, TR-FRET, nucleocapsid phosphoprotein, assay development

Supplementary information

|                                                                                                                   |           |
|-------------------------------------------------------------------------------------------------------------------|-----------|
| Figure S1 - <b>Determination of NP concentration in viral samples</b> .....                                       | <b>S2</b> |
| Figure S2 - <b>NP HTRF assay is able to detect recombinant SARS-CoV-2 NP</b> .....                                | <b>S3</b> |
| Figure S3 - <b>NP HTRF assay is able to detect SARS-CoV-2 NP in TCS and cell lysates</b> .....                    | <b>S4</b> |
| Figure S4 - <b>NP HTRF assay is able to detect transiently transfected SARS-CoV-2 NP</b> .....                    | <b>S5</b> |
| Figure S5 - <b>Sequence alignment of VoC Beta, Gamma, and Epsilon compared with SARS-CoV-2 USA-WA1/2020</b> ..... | <b>S6</b> |

A

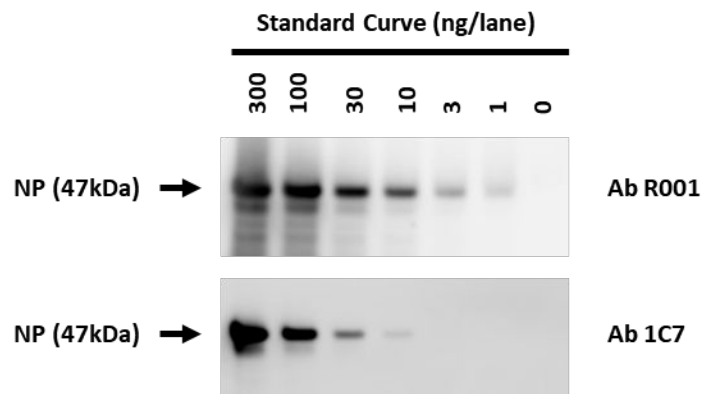

**Figure S1. Determination of NP concentration in viral samples.** Western blot of recombinant SARS-CoV-2 NP using donor antibody R001 and acceptor antibody 1C7 at 1:1000 dilution.

A

Media only  
1h

|                       | 1h incubation      |                   |                     |                   |
|-----------------------|--------------------|-------------------|---------------------|-------------------|
| Concentration (ng/mL) | 5 nM D:<br>10 nM A | 1 nM D:<br>2 nM A | 10 nM D:<br>10 nM A | 2 nM D:<br>2 nM A |
| 1500                  | 12.6               | 43.5              | 23.5                | 55.0              |
| 750                   | 8.7                | 38.7              | 15.2                | 54.8              |
| 375                   | 5.2                | 23.3              | 8.7                 | 37.1              |
| 187.5                 | 3.2                | 12.8              | 4.9                 | 21.8              |
| 93.8                  | 2.1                | 7.1               | 3.1                 | 10.9              |
| 46.9                  | 1.6                | 4.3               | 2.0                 | 6.4               |
| 23.4                  | 1.4                | 2.6               | 1.6                 | 3.9               |
| 11.7                  | 1.2                | 1.9               | 1.3                 | 2.5               |
| 5.9                   | 1.1                | 1.5               | 1.1                 | 1.7               |
| 2.9                   | 1.0                | 1.3               | 1.1                 | 1.4               |
| 1.5                   | 1.0                | 1.1               | 1.0                 | 1.2               |
| 0                     | 1.0                | 1.0               | 1.0                 | 1.0               |

B

Media only  
O/N

|                       | O/N 4°C            |                   |                     |                   |
|-----------------------|--------------------|-------------------|---------------------|-------------------|
| Concentration (ng/mL) | 5 nM D:<br>10 nM A | 1 nM D:<br>2 nM A | 10 nM D:<br>10 nM A | 2 nM D:<br>2 nM A |
| 1500                  | 9.2                | 35.1              | 17.7                | 45.0              |
| 750                   | 6.6                | 37.7              | 11.5                | 51.1              |
| 375                   | 4.2                | 26.0              | 6.4                 | 42.2              |
| 187.5                 | 2.7                | 12.8              | 3.8                 | 24.6              |
| 93.8                  | 1.9                | 6.5               | 2.5                 | 11.4              |
| 46.9                  | 1.5                | 3.8               | 1.7                 | 6.1               |
| 23.4                  | 1.3                | 2.4               | 1.4                 | 3.6               |
| 11.7                  | 1.1                | 1.7               | 1.2                 | 2.4               |
| 5.9                   | 1.1                | 1.4               | 1.0                 | 1.8               |
| 2.9                   | 1.0                | 1.2               | 1.0                 | 1.4               |
| 1.5                   | 1.0                | 1.1               | 1.0                 | 1.2               |
| 0                     | 1.0                | 1.0               | 1.0                 | 1.0               |

C

Media + cells  
1h

|                       | 1h incubation      |                   |                     |                   |
|-----------------------|--------------------|-------------------|---------------------|-------------------|
| Concentration (ng/mL) | 5 nM D:<br>10 nM A | 1 nM D:<br>2 nM A | 10 nM D:<br>10 nM A | 2 nM D:<br>2 nM A |
| 1500                  | 15.0               | 39.9              | 23.8                | 45.2              |
| 750                   | 11.3               | 36.5              | 19.0                | 50.8              |
| 375                   | 7.2                | 29.5              | 12.4                | 39.6              |
| 187.5                 | 4.6                | 18.5              | 7.1                 | 27.6              |
| 93.8                  | 2.9                | 11.1              | 4.3                 | 15.2              |
| 46.9                  | 2.0                | 6.0               | 2.7                 | 10.1              |
| 23.4                  | 1.5                | 3.8               | 1.9                 | 5.1               |
| 11.7                  | 1.2                | 2.5               | 1.5                 | 3.8               |
| 5.9                   | 1.1                | 1.9               | 1.2                 | 2.5               |
| 2.9                   | 1.0                | 1.4               | 1.1                 | 1.7               |
| 1.5                   | 1.0                | 1.2               | 1.0                 | 1.4               |
| 0                     | 1.0                | 1.0               | 1.0                 | 1.0               |

D

Media + cells  
O/N

|                       | O/N 4°C            |                   |                     |                   |
|-----------------------|--------------------|-------------------|---------------------|-------------------|
| Concentration (ng/mL) | 5 nM D:<br>10 nM A | 1 nM D:<br>2 nM A | 10 nM D:<br>10 nM A | 2 nM D:<br>2 nM A |
| 1500                  | 12.0               | 34.7              | 22.4                | 36.8              |
| 750                   | 9.1                | 42.8              | 16.6                | 48.0              |
| 375                   | 5.6                | 37.2              | 9.1                 | 49.3              |
| 187.5                 | 3.7                | 20.8              | 5.4                 | 35.1              |
| 93.8                  | 2.5                | 10.6              | 3.4                 | 17.7              |
| 46.9                  | 1.7                | 5.7               | 2.2                 | 9.5               |
| 23.4                  | 1.4                | 3.3               | 1.6                 | 5.3               |
| 11.7                  | 1.2                | 2.3               | 1.3                 | 3.3               |
| 5.9                   | 1.0                | 1.6               | 1.1                 | 2.3               |
| 2.9                   | 1.0                | 1.3               | 1.0                 | 1.6               |
| 1.5                   | 0.9                | 1.2               | 1.0                 | 1.4               |
| 0                     | 1.0                | 1.0               | 1.0                 | 1.0               |

**Figure S2. NP HTRF assay is able to detect recombinant SARS-CoV-2 NP. (A)** S/B for Vero E6 NP in media with 1h incubation. **(B)** S/B for Vero E6 NP in media with O/N incubation. **(C)** S/B for Vero E6 NP in media and cells with 1h incubation. **(D)** S/B for Vero E6 NP in media and cells with O/N incubation.

**A**

| Dilution Factor | Mock TCS | 24h TCS | 48h TCS |
|-----------------|----------|---------|---------|
| no dilution     | 0.8      | 5.4     | 9.8     |
| 15              | 1.1      | 2.0     | 8.1     |
| 45              | 1.0      | 1.4     | 3.7     |
| 135             | 1.1      | 1.1     | 2.0     |
| 405             | 1.0      | 1.0     | 1.4     |
| 1215            | 1.0      | 1.0     | 1.1     |
| 3645            | 1.0      | 1.0     | 1.1     |
| 10935           | 1.0      | 1.0     | 1.0     |
| 32805           | 1.0      | 1.0     | 1.0     |
| 98415           | 1.0      | 1.0     | 1.0     |
| 295245          | 1.0      | 0.9     | 1.0     |
| 885735          | 1.0      | 1.0     | 1.0     |

**B**

| Dilution Factor | Mock Lysate | 24h Lysate | 48h Lysate |
|-----------------|-------------|------------|------------|
| 15              | 0.8         | 9.7        | 6.0        |
| 45              | 1.1         | 26.8       | 41.0       |
| 135             | 1.0         | 15.8       | 31.5       |
| 405             | 1.0         | 6.0        | 16.6       |
| 1215            | 1.0         | 2.6        | 6.2        |
| 3645            | 1.0         | 1.5        | 2.5        |
| 10935           | 1.0         | 1.2        | 1.4        |
| 32805           | 1.0         | 1.0        | 1.0        |
| 98415           | 1.0         | 1.0        | 1.0        |
| 295245          | 1.0         | 1.0        | 1.0        |
| 885735          | 1.0         | 0.9        | 0.9        |
| 2657205         | 1.0         | 1.0        | 1.0        |

**Figure S3. NP HTRF assay is able to detect SARS-CoV-2 NP in TCS and cell lysates. (A)** S/B for Vero E6 TCS. **(B)** S/B for Vero E6 cell lysate.

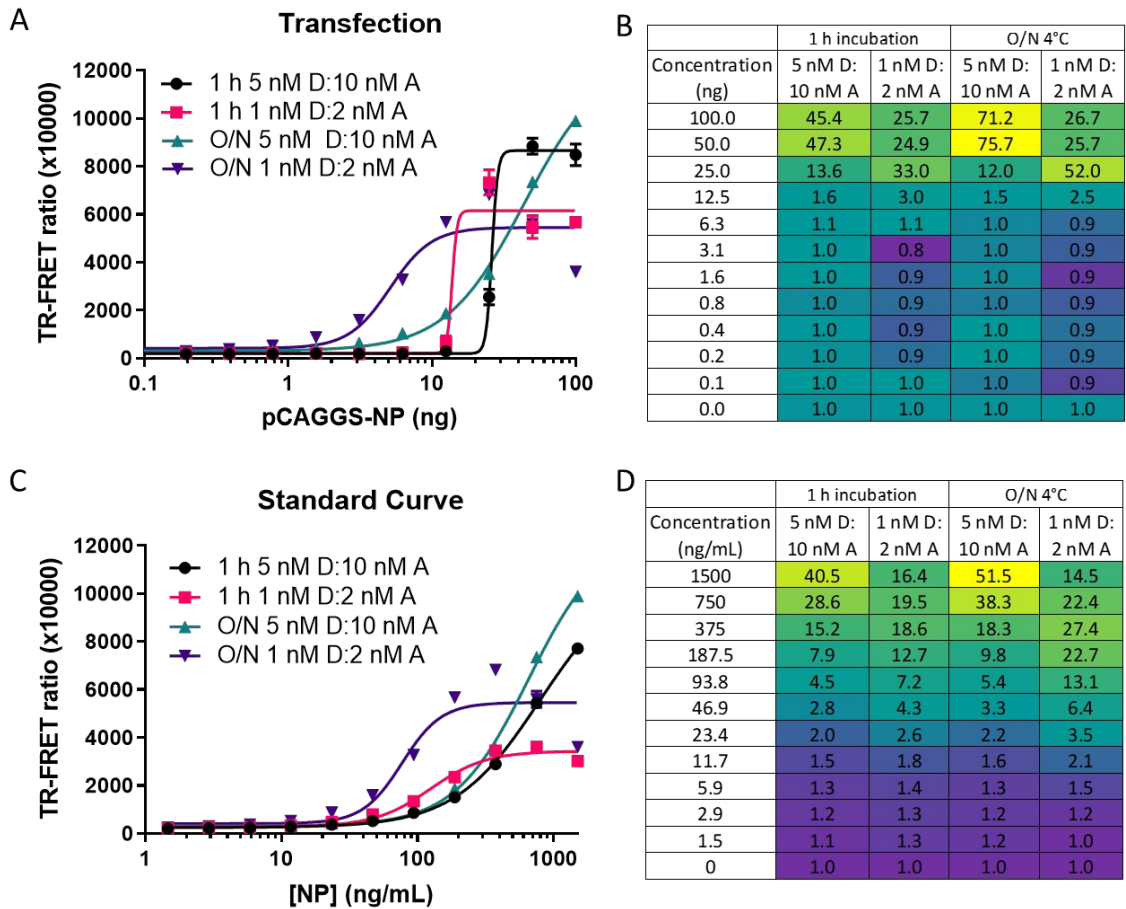

**Figure S4. NP HTRF assay is able to detect transiently transfected SARS-CoV-2 NP. (A)** TR-FRET ratio from Vero E6 cells transfected with a pCAGGS plasmid encoding SARS-CoV-2 USA-WA1/2020 NP for 24h starting at 100 ng serially diluted 1:2. **(B)** S/B values for A. **(C)** TR-FRET ratio from Vero E6 cells treated with SARS-CoV-2 NP starting at 1500 ng/mL and serially diluted 1:2. **(D)** S/B values for C. Cells were incubated with HTRF reagents for 1h at RT or O/N at 4°C. N=3 wells in a half-area 96-well plate. Error bars indicate S.D.

P80R

↓

|          |    |                                                                      |     |
|----------|----|----------------------------------------------------------------------|-----|
| USA/WA-1 | 61 | KEDLKFPRGQGVPINTNSS <b>P</b> DDQIGYYRRATRRIRGGDGKMKDLSRWYFYLLGTGPEAG | 120 |
| Beta     | 61 | KEDLKFPRGQGVPINTNSS <b>P</b> DDQIGYYRRATRRIRGGDGKMKDLSRWYFYLLGTGPEAG | 120 |
| Gamma    | 61 | KEDLKFPRGQGVPINTNSS <b>R</b> DDQIGYYRRATRRIRGGDGKMKDLSRWYFYLLGTGPEAG | 120 |
| Epsilon  | 61 | KEDLKFPRGQGVPINTNSS <b>P</b> DDQIGYYRRATRRIRGGDGKMKDLSRWYFYLLGTGPEAG | 120 |

R203K G204R T205I

M234I

↓

↓

|          |     |                                                                                     |     |
|----------|-----|-------------------------------------------------------------------------------------|-----|
| USA/WA-1 | 181 | QASSRSSSRNNSRNSTPGSS <b>RG</b> TSPARMAGNGGDAALALLLDRLNQLESK <b>MSG</b> KGQQ         | 240 |
| Beta     | 181 | QASSRSSSRNNSRNSTPGSS <b>RG</b> <u>I</u> SPARMAGNGGDAALALLLDRLNQLESK <b>MSG</b> KGQQ | 240 |
| Gamma    | 181 | QASSRSSSRNNSRNSTPGSS <b>KR</b> TSPARMAGNGGDAALALLLDRLNQLESK <b>MSG</b> KGQQ         | 240 |
| Epsilon  | 181 | QASSRSSSRNNSRNSTPGSS <b>KGI</b> SPARMAGNGGDAALALLLDRLNQLESK <b>I</b> SGKGQQ         | 240 |

**Figure S5. Sequence alignment of VoC Beta, Gamma, and Epsilon compared with SARS-CoV-2 USA-WA1/2020.** ClustalO alignment of amino acid sequences for NP regions that were different compared to the reference USA/WA-1 strain. Red, bolded, and underlined letters indicate mutations. Mutation P80R (Gamma), R203K (Gamma, Epsilon), G204R (Gamma), T205I (Beta, Epsilon), and M234I (Epsilon). Sequences were obtained from GISAID.
